# Supplementary material for: Collaborative pharmaceutical care in an Irish hospital: uncontrolled before-after study
Source: PubMed Central journal article supplement — BMJ Qual Saf. 2014 Feb 6;23(7):574–83. doi: 10.1136/bmjqs-2013-002188 (PMC4078714; doi:10.1136/bmjqs-2013-002188), 2014-02-06
Supplement: bmjqs-2013-002188-s1.pdf [file bmjqs-2013-002188-s1.pdf]

Patient's demographic and clinical characteristics, primary outcome data availability

| Characteristic                                     | Primary outcome data available (n=209) | Primary outcome data not available (n=24) | p     |
|----------------------------------------------------|----------------------------------------|-------------------------------------------|-------|
| Gender, (%), male                                  | 92 (44.0)                              | 9 (37.5)                                  | 0.350 |
| General Medical Service* status, (%) in receipt of | 121/207                                | 12/24                                     | 0.281 |
| Employment status, (%) Working                     | 90 (43.3)                              | 15 (62.5)                                 | 0.058 |
| Smoking status, (%) current user                   | 64 (52.9)                              | 9 (37.5)                                  | 0.649 |
| Alcohol use, (%) current user                      | 87 (41.6)                              | 12 (50.0)                                 | 0.587 |
| Study group, (%) PACT intervention                 | 108 (51.7)                             | 4 (16.7)                                  | 0.002 |
| Age, years, median (IQR)                           | 64 (54-76)                             | 58 (50-65)                                | 0.034 |
| Length of stay, days, median (IQR)                 | 7 (4-12)                               | 6 (3-12)                                  | 0.454 |
| Charlson Co-morbidity index, median (IQR)          | 2 (1-3)                                | 2 (1-3)                                   | 0.740 |
| Number of medicines <sup>§</sup> , median (IQR)    | 10 (7-12)                              | 9.5 (5-14)                                | 0.940 |

IQR, Inter-quartile Range; NS, not statistically significant at 0.05.

\* General Medical Service refers to government support for healthcare including GP visits and prescribed medication, eligibility is largely based on income.

<sup>§</sup> Relates to the total number of medications prescribed before admission and those added during admission that remained active at discharge, exclusive of medications commenced and stopped within the hospital episode.
